# Supplementary material for: The unique nucleophilic reactivity of arylaminochlorocarbenesElectronic supplementary information (ESI) available: experimental details, characterization data for compounds 7 and 8. See http://www.rsc.org/suppdata/cc/b2/b210098c/
Source: Royal Society of Chemistry journal article supplement (doi:10.1039/b210098c), 2002-11-26
Supplement: b210098c.doc [file b210098c.doc]

Experimental details:

Under nitrogen atmosphere, 4-substituted *N*-methylformanilide **1a-e** (0.01 mol) and oxalyl chloride (0.012 mol) were mixed at 0 0C to form a sticky solid, which was then cooled to – 78 0C. To this solid Vilsmeier reagent, xylene (5 ml) followed a solution of Hünig’s base (0.012 mol) in xylene (10 ml) was added with stirring to form a suspension. After a ½ h, diethyl acetylenedicarboxylate **4** in xylene (5 ml) was added and the temperature increased from – 78 0C to room temperature during 2 h. The reaction mixture was stirred at room temperature for 1 h and then at 50 0C for another 2 h. The reaction mixture was chromatographed directly. The xylene was removed by washing the column with light petroleum. The compound **5** and dimers **6** wereelutedwitha mixture of lightpetroleum and ethyl acetate (10:1). Finally, the red products **7** and **8** were isolated by eluting with light petroleum : ethyl acetate (4:1) .

Characterization data for compounds **7** and **8**:

| Compounds | mp | IR | HNMR CDCl3 | CNMR CDCl3 | MS | CHN |
| --- | --- | --- | --- | --- | --- | --- |
| **7a** | 108-109 | 1742, 1733, 1722, 1698, 1261, 1239. | 6.85 (1H, dd, *J* 8.9, 2.7), 6.52 (1H, d, *J*, 2.7), 6.50 (1H, d, *J* 9.0), 6.33 (1H, s), 4.37-4.42 (4H, m), 4.20 (2H, q, *J* 7.1), 3.75 (2H, q, *J* 6.8), 3.70 (3H, s), 3.04 (3H, s), 1.36-1.42 (6H, m), 1.25 (3H, t, *J* 7.1), 1.10 (3H, t, *J* 7.2). | 167.4, 165.5, 163.8, 162.4, 152.2, 141.6, 140.6, 139.7, 122.3, 119.8, 118.2, 117.6, 113.4, 112.1, 63.2, 62.7, 62.0, 61.7, 57.4, 56.2. | 318 (100), 442 (80), 448 (95), 477 (40), 523 (20, M+) /525 (6). | HAMS (FAB) 524.1694, C25H30ClNO9 requires 524.1682. |
| **7b** | 105-106 | 1744, 1722, 1696, 1259, 1237. | 6.96 (1H, d, *J* 8.2), 6.65 (1H, s), 6.39 (1H, d, *J* 8.3), 6.28 (1H, s), 4.27-4.36 (4H, m), 4.13 (2H, q, *J* 7.1), 3.66 (2H, q, *J* 7.1), 2.98 (3H, s), 2.10 (3H, s), 1.27-1.36 (6H, m), 1.17 (3H, t, *J* 7.1), 1.01 (3H, t, *J* 7.1). | 167.7, 165.5, 163.8, 162.4, 143.9, 142.1, 139.9, 134.2, 127.5, 127.2, 122.2, 117.5, 116.3, 112.3, 63.2, 62.7, 62.0, 61.7, 57.5, 36.3, 20.7, 14.5 (two carbons), 13.8. | 214 (100), 287 (41), 302 (24), 432 (24),  507 (2). |  |
| **8c** | 208-209 | 3431, 1838, 1812, 1748, 1637, 1507. | 7.12-7.13(1H, m), 6.99-7.06 (3H, m), 6.94 (2H, t, *J* 4.2), 6.60 (1H, d, *J* 7.5), 4.69 (2H, s), 3.68 (3H, s). | 161.9, 161.3, 160.5, 159.3 (d), 157.4, 146.0, 141.4, 132.5 (d), 130.0, 124.2 (d), 123.4 (d), 117.1, 116.9 (d), 116.7, 116.6, 57.4, 41.4. | 149 (64), 342(100, M+) | HAMS 342.0813, C18H12O3F2N2 requires 342.0810. |
| **8d** | 179-180 | 3436, 1818, 1763, 1729, 1637, 1489. | 7.32 (1H, dd, *J* 8.7, 2.4), 7.27 (2H, d, *J* 9.6), 7.08 (1H, d, *J* 8.7), 6.90 (2H, d, *J* 8.7), 6.88 (1H, d, *J* 2.4), 4.71 (2H, s), 3.69 (3H, s). | 161.7, 160.2, 148.4, 143.6, 132.2, 130.7, 130.4, 130.1, 130.0, 129.3, 123.2, 123.1, 122.7, 56.8, 41.5. | 165(90), 374 (100, M+)/376(66)/378(13). | C 57.12, H 2.83, N 6.94; C18H12Cl2N2O3 requires  C 57.62, H 3.22, N 7.46. |
| **8e** | 129-130 | 3446, 1817, 1752, 1637, 1487. | 7.46 (1H, d, *J* 8.5), 7.41 (2H, d, *J* 8.4), 7.03 (1H, s), 7.02 (1H, d, *J* 8.8), 6.84 (2H, d, *J* 8.4), 4.71 (2H, s), 3.69 (3H, s). | 161.6, 160.1, 148.9, 144.1, 133.0, 132.8, 132.5, 130.0, 123.5(two carbons), 122.7, 118.0, 116.9, 56.6, 41.4. | 155 (100), 462 (30, M+) /464(32) /466(25) /468(10). | C 47.00, H 2.41, N 5.73; C18H12Br2N2O3 requires C 46.58, H 2.61, N 6.04. |
